# Supplementary material for: An antagonist of the retinoid X receptor reduces the viability of Trichuris muris in vitro
Source: PubMed Central journal article supplement (PMC4261559; doi:10.1186/1471-2334-14-520), 2014-09-27

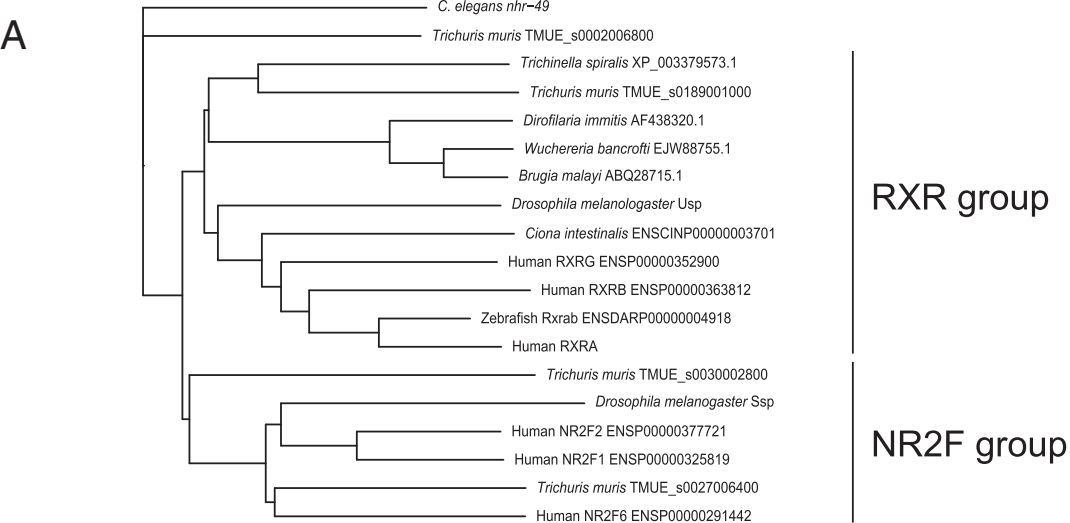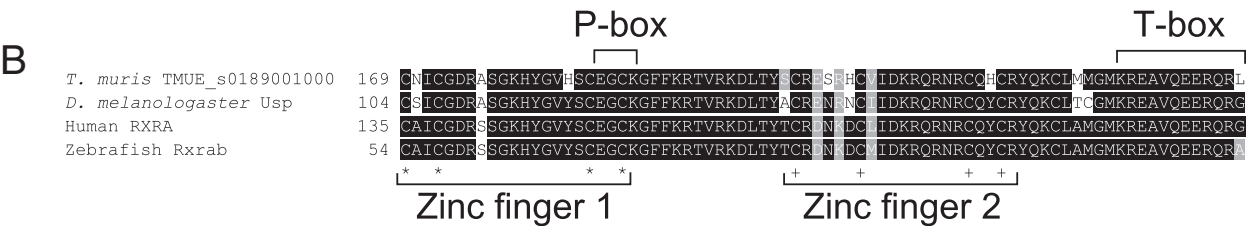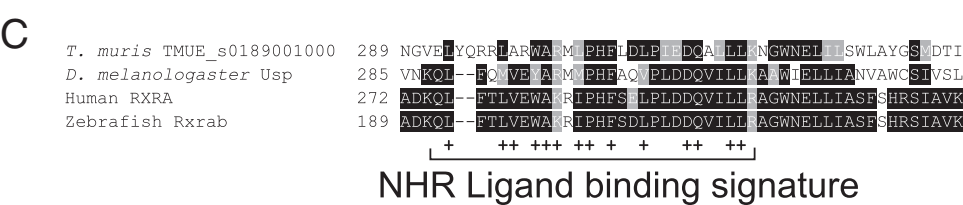

Supplement: 12879_2014_3841_MOESM1_ESM.pdf [file 12879_2014_3841_MOESM1_ESM.pdf]
